# Supplementary material
Source: Research Square preprint supplement (doi:10.21203/rs.3.rs-9086419/v1)
Supplement: Supplementary file 1 [file 6dd6940266f1a7b2d81379b0.pdf]

**Table 1:** Distribution of clinicopathological characteristics in the BMM cohort and associations to manual (n ≤ 411) and script-based (n ≤ 377) assessment of fraction of VEGF-C expressing stromal cells.

|                                   | VEGF-C Stromal Cell       |                     |                      |                       |                      | <i>P</i> -value <sup>b</sup> | VEGF-C Stromal Cell                                |                              |
|-----------------------------------|---------------------------|---------------------|----------------------|-----------------------|----------------------|------------------------------|----------------------------------------------------|------------------------------|
|                                   | Total<br><i>n</i> (col %) | 0%<br><i>n</i> (%)  | 1-5%<br><i>n</i> (%) | 6-25%<br><i>n</i> (%) | ≥26%<br><i>n</i> (%) |                              | Script-based, %<br><i>median</i><br>( <i>IQR</i> ) | <i>P</i> -value <sup>d</sup> |
| <b>No. of patients</b>            | 411                       | 49                  | 239                  | 90                    | 33                   |                              | ≤ 377                                              |                              |
| <b>Age, years<sup>a</sup></b>     | 57.0<br>(30.1-85.4)       | 66.0<br>(42.0-81.3) | 57.6<br>(35.1-84.4)  | 54.7<br>(33.0-75.9)   | 52.6<br>(45.1-73.8)  | < 0.001                      | -0.26 <sup>c</sup>                                 | <0.001                       |
| <b>Detection</b>                  |                           |                     |                      |                       |                      | 0.751                        |                                                    | 0.903                        |
| Screening                         | 174 (42.4)                | 15 (8.6)            | 108 (62.1)           | 40 (23.0)             | 11 (6.3)             |                              | 0.33<br>(1.10-1.20)                                |                              |
| Symptomatic                       | 236 (57.6)                | 34 (14.4)           | 131 (55.5)           | 50 (21.2)             | 21 (8.9)             |                              | 0.39<br>(0.10-1.10)                                |                              |
| Missing                           | 1                         | 0                   | 0                    | 0                     | 1                    |                              |                                                    |                              |
| <b>Tumor size</b>                 |                           |                     |                      |                       |                      | 0.124                        |                                                    | 0.651                        |
| T1                                | 274 (66.7)                | 34 (12.4)           | 165 (60.2)           | 56 (20.4)             | 19 (6.9)             |                              | 0.39<br>(0.09-1.07)                                |                              |
| T2                                | 137 (33.3)                | 15 (11.0)           | 74 (54.0)            | 34 (24.8)             | 14 (10.2)            |                              | 0.33<br>(0.11-1.20)                                |                              |
| <b>Tumor size, mm<sup>a</sup></b> | 18 (6-50)                 | 16 (13-22)          | 18 (15-25)           | 19 (15-27)            | 20 (14-25)           | 0.053                        | 0.07 <sup>c</sup>                                  | 0.159                        |
| <b>Nodal status</b>               |                           |                     |                      |                       |                      | 0.001                        |                                                    | <0.001                       |
| Negative                          | 248 (60.3)                | 38 (15.3)           | 149 (60.1)           | 45 (18.2)             | 16 (6.4)             |                              | 0.27<br>(0.05-0.85)                                |                              |
| Positive                          | 163 (39.7)                | 11 (6.8)            | 90 (55.2)            | 45 (27.6)             | 17 (10.4)            |                              | 0.56<br>(0.19-1.47)                                |                              |
| <b>Multifocal</b>                 |                           |                     |                      |                       |                      | 0.887                        |                                                    | 0.212                        |
| No                                | 375 (91.2)                | 46 (12.3)           | 216 (57.6)           | 83 (22.1)             | 30 (8.0)             |                              | 0.36<br>(0.09-1.10)                                |                              |
| Yes                               | 36 (8.8)                  | 3 (8.3)             | 23 (63.9)            | 7 (19.4)              | 3 (8.3)              |                              | 0.45<br>(0.15-1.71)                                |                              |
| <b>VI</b>                         |                           |                     |                      |                       |                      | 0.001                        |                                                    | <0.001                       |
| No                                | 266 (72.1)                | 37 (13.9)           | 160 (60.2)           | 52 (19.6)             | 17 (6.4)             |                              | 0.28<br>(0.08-0.86)                                |                              |
| Yes                               | 103 (27.9)                | 7 (6.8)             | 52 (50.5)            | 31 (30.1)             | 13 (12.6)            |                              | 0.57<br>(0.26-1.49)                                |                              |
| Missing                           | 42                        | 5                   | 27                   | 7                     | 3                    |                              |                                                    |                              |
| <b>TILs</b>                       |                           |                     |                      |                       |                      | <0.001                       |                                                    | <0.001                       |
| 0-9%                              | 177 (48.0)                | 29 (16.4)           | 106 (59.9)           | 35 (19.8)             | 7 (4.0)              |                              | 0.32<br>(0.08-0.98)                                |                              |
| 10-49%                            | 148 (40.1)                | 14 (9.5)            | 88 (59.5)            | 31 (21.0)             | 15 (10.1)            |                              | 0.28<br>(0.10-0.91)                                |                              |
| 50-74%                            | 32 (8.7)                  | 1 (3.1)             | 12 (37.5)            | 14 (43.8)             | 5 (15.6)             |                              | 0.84<br>(0.39-1.67)                                |                              |
| ≥75%                              | 12 (3.2)                  | 0 (0.0)             | 6 (50.0)             | 3 (25.0)              | 3 (25.0)             |                              | 1.44<br>(0.60-2.33)                                |                              |
| Missing                           | 42                        | 5                   | 27                   | 7                     | 3                    |                              |                                                    |                              |
| <b>NHG</b>                        |                           |                     |                      |                       |                      | < 0.001                      |                                                    | 0.194                        |
| I                                 | 85 (20.8)                 | 14 (16.5)           | 52 (61.2)            | 16 (18.8)             | 3 (3.5)              |                              | 0.41<br>(0.11-1.30)                                |                              |
| II                                | 211 (51.7)                | 25 (11.8)           | 134 (63.5)           | 38 (18.0)             | 14 (6.6)             |                              | 0.30<br>(0.09-0.91)                                |                              |
| III                               | 112 (27.4)                | 9 (8.0)             | 52 (46.4)            | 36 (32.1)             | 15 (13.4)            |                              | 0.48<br>(0.15-1.23)                                |                              |
| Missing                           | 3                         | 1                   | 1                    | 0                     | 1                    |                              |                                                    |                              |
| <b>ER-status</b>                  |                           |                     |                      |                       |                      | 0.024                        |                                                    | 0.002                        |

|                                 |            |           |            |           |           |                     |       |
|---------------------------------|------------|-----------|------------|-----------|-----------|---------------------|-------|
| Negative                        | 49 (12.2)  | 1 (2.0)   | 30 (61.2)  | 11 (22.4) | 7 (14.3)  | 0.84<br>(0.26-1.89) |       |
| Positive                        | 353 (87.8) | 48 (13.6) | 203 (57.5) | 77 (21.8) | 25 (7.1)  | 0.31<br>(0.09-1.00) |       |
| Missing                         | 9          | 0         | 6          | 2         | 1         |                     |       |
| <b>PR-status</b>                |            |           |            |           |           | 0.022               | 0.003 |
| Negative                        | 86 (22.7)  | 7 (8.1)   | 47 (54.6)  | 20 (23.3) | 12 (14.0) | 0.61<br>(0.21-1.54) |       |
| Positive                        | 293 (77.3) | 41 (14.0) | 168 (57.3) | 65 (22.2) | 19 (6.5)  | 0.30<br>(0.08-1.03) |       |
| Missing                         | 32         | 1         | 24         | 5         | 2         |                     |       |
| <b>HER2-status</b>              |            |           |            |           |           | 0.220               | 0.447 |
| Negative                        | 327 (80.3) | 37 (11.3) | 197 (60.2) | 73 (22.3) | 20 (6.1)  | 0.34<br>(0.08-1.10) |       |
| Positive                        | 80 (19.7)  | 12 (15.0) | 40 (50.0)  | 16 (20.0) | 12 (15.0) | 0.44<br>(0.15-1.13) |       |
| Missing                         | 4          | 0         | 2          | 1         | 1         |                     |       |
| <b>Ki67 ≥ 20%</b>               |            |           |            |           |           | < 0.001             | 0.029 |
| Negative                        | 266 (67.0) | 42 (15.8) | 159 (59.8) | 52 (19.6) | 13 (4.9)  | 0.32<br>(0.08-1.04) |       |
| Positive                        | 131 (33.0) | 7 (5.3)   | 70 (53.4)  | 36 (27.5) | 18 (13.7) | 0.44<br>(0.15-1.21) |       |
| Missing                         | 14         | 0         | 10         | 2         | 2         |                     |       |
| <b>Histological type</b>        |            |           |            |           |           | 0.125               | 0.121 |
| NST                             | 298 (72.7) | 30 (10.1) | 177 (59.4) | 66 (22.2) | 25 (8.4)  | 0.39<br>(0.11-1.10) |       |
| ILC                             | 75 (18.3)  | 14 (18.7) | 40 (53.3)  | 19 (25.3) | 2 (2.7)   | 0.27<br>(0.02-0.98) |       |
| Other                           | 37 (9.0)   | 5 (13.5)  | 22 (59.5)  | 5 (13.5)  | 5 (13.5)  | 0.63<br>(0.14-2.26) |       |
| Missing                         | 1          | 0         | 0          | 0         | 0         |                     |       |
| <b>St Gallen Classification</b> |            |           |            |           |           | 0.013               | 0.029 |
| Luminal A/B                     | 275 (72.6) | 36 (13.1) | 163 (59.3) | 62 (22.6) | 14 (5.1)  | 0.31<br>(0.08-0.99) |       |
| HER2+                           | 75 (19.8)  | 12 (16.0) | 36 (48.0)  | 16 (21.3) | 11 (14.7) | 0.42<br>(0.15-1.14) |       |
| TNBC                            | 29 (7.6)   | 0 (0.0)   | 17 (58.6)  | 7 (24.1)  | 5 (17.2)  | 1.01<br>(0.25-2.47) |       |
| Missing                         | 32         | 1         | 23         | 5         | 3         |                     |       |

Abbreviations and definitions: VEGF-C, Vascular endothelial growth factor C; IQR, Inter quartile range; Multifocal, > 2cm between tumors; VI, Vascular invasion; TILs, Tumor infiltrating lymphocytes; NHG, Nottingham histological grade; ER, Estrogen receptor >1%; PR, Progesterone receptor >1%; HER2, Human epidermal growth factor receptor 2; Ki67, a proliferation marker; NST, No specific type; ILC, Invasive lobular carcinoma; TNBC, triple negative breast cancer

<sup>a</sup> Median (IQR)

<sup>b</sup> Tests of zero slope in linear regression models with VEGF-C as the dependent variable and each of the clinicopathological variables as independent variables were used to assess evidence for association. Integer coding 1-4 was used for the four VEGF-C categories from the manual assessment. For non-ordinal variables Pearson's Chi<sup>2</sup> test was used.

<sup>c</sup> Spearman's  $\rho$

<sup>d</sup> Test of  $\rho=0$  for age and tumor size. Kruskal-Wallis test for categorical variables.

**Table 2:** Distribution of clinicopathological characteristics in the BMM cohort and associations to manual (n ≤ 411) and script-based (n ≤ 377) assessment of cancer cell VEGF-C intensity.

|                                   | Total<br>n (col %)  | Cancer cell VEGF-C<br>Manual |                     |                                           | P-value <sup>c</sup> | Cancer cell VEGF-C<br>Script-based |                          |
|-----------------------------------|---------------------|------------------------------|---------------------|-------------------------------------------|----------------------|------------------------------------|--------------------------|
|                                   |                     | Negative<br>n (%)            | Weak<br>n (%)       | Moderate/<br>Strong <sup>b</sup><br>n (%) |                      | median<br>(IQR) <sup>d</sup>       | P-<br>value <sup>e</sup> |
| <b>No. of patients</b>            | 411                 | 17                           | 333                 | 61                                        |                      | ≤ 375                              |                          |
| <b>Age, years<sup>a</sup></b>     | 57.0<br>(30.1-85.4) | 58.4<br>(56.5-64.1)          | 57.8<br>(51.6-67.7) | 53.2<br>(47.4-64.0)                       | 0.010                | -0.18 <sup>f</sup>                 | <0.001                   |
| <b>Detection</b>                  |                     |                              |                     |                                           | 0.138                |                                    | <0.001                   |
| Screening                         | 174 (42.4)          | 9 (5.2)                      | 144 (82.8)          | 21 (12.1)                                 |                      | 1.68<br>(1.23-2.50)                |                          |
| Symptomatic                       | 236 (57.6)          | 8 (3.4)                      | 189 (80.1)          | 39 (16.5)                                 |                      | 2.09<br>(1.58-2.78)                |                          |
| Missing                           | 1                   | 0                            | 0                   | 1                                         |                      |                                    |                          |
| <b>Tumor size</b>                 |                     |                              |                     |                                           | 0.284                |                                    | 0.038                    |
| T1                                | 274 (66.7)          | 15 (5.5)                     | 219 (79.9)          | 40 (14.6)                                 |                      | 1.85<br>(1.33-2.60)                |                          |
| T2                                | 137 (33.3)          | 2 (1.5)                      | 114 (83.2)          | 21 (15.3)                                 |                      | 2.08<br>(1.57-2.81)                |                          |
| <b>Tumor size, mm<sup>a</sup></b> | 18 (6-50)           | 14 (11-16)                   | 18 (15-25)          | 17 (15-25)                                | 0.269                | 0.12 <sup>f</sup>                  | 0.016                    |
| <b>Nodal status</b>               |                     |                              |                     |                                           | 0.896                |                                    | 0.316                    |
| Negative                          | 248 (60.3)          | 12 (4.8)                     | 198 (79.8)          | 38 (15.3)                                 |                      | 1.88<br>(1.39-2.57)                |                          |
| Positive                          | 163 (39.7)          | 5 (3.1)                      | 135 (82.8)          | 23 (14.1)                                 |                      | 2.05<br>(1.44-2.72)                |                          |
| <b>Multifocal</b>                 |                     |                              |                     |                                           | 0.112                |                                    | 0.022                    |
| No                                | 375 (91.2)          | 14 (3.7)                     | 303 (80.8)          | 58 (15.5)                                 |                      | 1.99<br>(1.44-2.71)                |                          |
| Yes                               | 36 (8.8)            | 3 (8.3)                      | 30 (83.3)           | 3 (8.3)                                   |                      | 1.53<br>(1.20-2.20)                |                          |
| <b>VI</b>                         |                     |                              |                     |                                           | 0.041                |                                    | 0.008                    |
| No                                | 266 (72.1)          | 11 (4.1)                     | 221 (83.1)          | 34 (12.8)                                 |                      | 1.87<br>(1.33-2.57)                |                          |
| Yes                               | 103 (27.9)          | 2 (1.9)                      | 80 (77.7)           | 21 (20.4)                                 |                      | 2.14<br>(1.58-2.86)                |                          |
| Missing                           | 42                  | 4                            | 32                  | 6                                         |                      |                                    |                          |
| <b>TILs</b>                       |                     |                              |                     |                                           | 0.078                |                                    | 0.067                    |
| 0-9%                              | 177 (48.0)          | 10 (5.6)                     | 142 (80.2)          | 25 (14.1)                                 |                      | 1.76<br>(1.32-2.49)                |                          |
| 10-49%                            | 148 (40.1)          | 3 (2.0)                      | 124 (83.8)          | 21 (14.2)                                 |                      | 2.03<br>(1.49-2.81)                |                          |
| 50-74%                            | 32 (8.7)            | 0 (0.0)                      | 26 (81.2)           | 6 (18.8)                                  |                      | 2.22<br>(1.72-2.85)                |                          |
| ≥75%                              | 12 (3.2)            | 0 (0.0)                      | 9 (75.0)            | 3 (25.0)                                  |                      | 1.85<br>(1.62-2.78)                |                          |
| Missing                           | 42                  | 4                            | 32                  | 6                                         |                      |                                    |                          |
| <b>NHG</b>                        |                     |                              |                     |                                           | 0.886                |                                    | 0.396                    |
| I                                 | 85 (20.8)           | 1 (1.2)                      | 68 (80.0)           | 16 (18.8)                                 |                      | 1.85<br>(1.41-2.55)                |                          |
| II                                | 211 (51.7)          | 13 (6.2)                     | 174 (82.5)          | 24 (11.4)                                 |                      | 1.93<br>(1.33-2.62)                |                          |
| III                               | 112 (27.4)          | 3 (2.7)                      | 89 (79.5)           | 20 (17.9)                                 |                      | 1.99<br>(1.54-2.69)                |                          |
| Missing                           | 3                   | 0                            | 2                   | 1                                         |                      |                                    |                          |

|                                 |            |          |            |           |        |                     |        |
|---------------------------------|------------|----------|------------|-----------|--------|---------------------|--------|
| <b>ER-status</b>                |            |          |            |           | 0.001  |                     | 0.051  |
| Negative                        | 49 (12.2)  | 0 (0.0)  | 36 (70.6)  | 15 (29.4) |        | 2.22<br>(1.63-2.83) |        |
| Positive                        | 353 (87.8) | 17 (4.8) | 288 (82.0) | 46 (13.1) |        | 1.94<br>(1.39-2.62) |        |
| Missing                         | 9          | 0        | 9          | 0         |        |                     |        |
| <b>PR-status</b>                |            |          |            |           | 0.048  |                     | 0.140  |
| Negative                        | 86 (22.7)  | 1 (1.2)  | 68 (79.1)  | 17 (19.8) |        | 2.12<br>(1.55-2.74) |        |
| Positive                        | 293 (77.3) | 16 (5.5) | 237 (80.9) | 40 (13.6) |        | 1.90<br>(1.33-2.68) |        |
| Missing                         | 32         | 0        | 28         | 4         |        |                     |        |
| <b>HER2-status</b>              |            |          |            |           | 0.284  |                     | 0.312  |
| Negative                        | 327 (80.3) | 12 (3.7) | 264 (80.7) | 51 (15.6) |        | 1.95<br>(1.37-2.63) |        |
| Positive                        | 80 (19.7)  | 5 (6.2)  | 65 (81.2)  | 10 (12.5) |        | 1.96<br>(1.57-2.68) |        |
| Missing                         | 4          | 0        | 4          | 0         |        |                     |        |
| <b>Ki67 ≥ 20%</b>               |            |          |            |           | 0.004  |                     | <0.001 |
| Negative                        | 266 (67.0) | 16 (6.0) | 216 (81.2) | 34 (12.8) |        | 1.81<br>(1.27-2.53) |        |
| Positive                        | 131 (33.0) | 1 (0.8)  | 103 (78.6) | 27 (20.6) |        | 2.21<br>(1.62-2.90) |        |
| Missing                         | 14         | 0        | 14         | 0         |        |                     |        |
| <b>Histological type</b>        |            |          |            |           | <0.001 |                     | 0.011  |
| NST                             | 298 (72.7) | 8 (2.7)  | 247 (82.9) | 43 (14.4) |        | 2.00<br>(1.41-2.62) |        |
| ILC                             | 75 (18.3)  | 9 (12.0) | 61 (81.3)  | 5 (6.7)   |        | 1.70<br>(1.18-2.30) |        |
| Other                           | 37 (9.0)   | 0 (0.0)  | 25 (67.6)  | 12 (32.4) |        | 2.44<br>(1.71-2.91) |        |
| Missing                         | 1          | 0        | 0          | 1         |        |                     |        |
| <b>St Gallen Classification</b> |            |          |            |           | <0.001 |                     | 0.059  |
| Luminal A/B                     | 275 (72.6) | 12 (4.4) | 228 (82.9) | 35 (12.7) |        | 1.94<br>(1.35-2.58) |        |
| HER2+                           | 75 (19.8)  | 5 (6.7)  | 61 (81.3)  | 9 (12.0)  |        | 1.96<br>(1.56-2.72) |        |
| TNBC                            | 29 (7.6)   | 0 (0.0)  | 16 (55.2)  | 13 (44.8) |        | 2.49<br>(1.79-3.14) |        |
| Missing                         | 32         | 0        | 28         | 4         |        |                     |        |

Abbreviations and definitions: VEGF-C, Vascular endothelial growth factor C; IQR, Inter quartile range; Multifocal, > 2cm between tumors; VI, Vascular invasion; TILs, Tumor infiltrating lymphocytes; NHG, Nottingham histological grade; ER, Estrogen receptor >1%; PR, Progesterone receptor >1%; HER2, Human epidermal growth factor receptor 2; Ki67, a proliferation marker; NST, No specific type; ILC, Invasive lobular carcinoma; TNBC, triple negative breast cancer

<sup>a</sup> Median (IQR)

<sup>b</sup> Only two patients with strong intensity, why the classes moderate and strong were merged.

<sup>c</sup> Tests of zero slope in linear regression models with VEGF-C as the dependent variable and each of the clinicopathological variables as independent variables were used to assess evidence for association. Integer coding 1-4 was used for the three VEGF-C categories from the manual assessment. For non-ordinal variables Pearson's Chi<sup>2</sup> test was used.

<sup>d</sup> Measured in arbitrary units. Values divided by 1 SD. Hence, a difference of 1 unit between groups corresponds to a 1 SD difference.

<sup>e</sup> Test of  $p=0$  for age and tumor size. Kruskal-Wallis test for categorical variables.

<sup>f</sup> Spearman's  $\rho$

**Table 3:** Univariable logistic regression analyses of clinicopathological variables on the outcome of positive lymph node status.

|                                               | <i>n</i> | <b>OR (95% CI)</b>                | <b>P-value</b>     |
|-----------------------------------------------|----------|-----------------------------------|--------------------|
| <b>Age, years</b>                             | 411      | 0.968 (0.951-0.985)               | < 0.001            |
| <b>Detection</b>                              | 410      |                                   | < 0.001            |
| Screening                                     |          | 1.00                              |                    |
| Symptomatic                                   |          | 2.08 (1.38)                       |                    |
| <b>Tumor size, mm</b>                         | 411      | 1.101 (1.071-1.132)               | < 0.001            |
| <b>Multifocal</b>                             | 411      |                                   | 0.002              |
| No                                            |          | 1.00                              |                    |
| Yes                                           |          | 2.97 (1.46-6.05)                  |                    |
| <b>VI</b>                                     | 369      |                                   | < 0.001            |
| No                                            |          | 1.00                              |                    |
| Yes                                           |          | 3.41 (2.13-5.48)                  |                    |
| <b>NHG</b>                                    | 408      |                                   | 0.086 <sup>a</sup> |
| I                                             |          | 1.00                              |                    |
| II                                            |          | 1.16 (0.68-1.96)                  | 0.591              |
| III                                           |          | 1.80 (1.00-3.22)                  | 0.048              |
| <b>ER-status</b>                              | 402      |                                   | 0.847              |
| Positive                                      |          | 1.00                              |                    |
| Negative                                      |          | 1.06 (0.58-1.95)                  |                    |
| <b>PR-status</b>                              | 379      |                                   | 0.854              |
| Positive                                      |          | 1.00                              |                    |
| Negative                                      |          | 1.05 (0.64-1.71)                  |                    |
| <b>HER2-status</b>                            | 407      |                                   | 0.269              |
| Negative                                      |          | 1.00                              |                    |
| Positive                                      |          | 1.32 (0.81-2.17)                  |                    |
| <b>Ki67 ≥ 20%</b>                             | 397      |                                   | 0.032              |
| Negative                                      |          | 1.00                              |                    |
| Positive                                      |          | 1.59 (1.04-2.44)                  |                    |
| <b>Histological type</b>                      | 410      |                                   | 0.453 <sup>a</sup> |
| NST                                           |          | 1.00                              |                    |
| ILC                                           |          | 0.74 (0.44-1.26)                  | 0.274              |
| Other                                         |          | 0.76 (0.37-1.55)                  | 0.451              |
| <b>Stromal VEGF-C fraction, manual</b>        | 411      |                                   | 0.005 <sup>a</sup> |
| 0%                                            |          | 1.00                              |                    |
| 1-5%                                          |          | 2.09 (1.02-4.29)                  | 0.045              |
| 6-25%                                         |          | 3.45 (1.57-7.60)                  | 0.002              |
| ≥26%                                          |          | 3.67 (1.41-9.56)                  | 0.008              |
| <b>Stromal VEGF-C fraction, %, SB</b>         | 377      | 1.140 (1.011-1.286)               | 0.019              |
| <b>Stromal VEGF-C fraction, SB log2-scale</b> | 377      | 1.212 (1.115- 1.318) <sup>b</sup> | < 0.001            |
| <b>Cancer cells Cytoplasmic</b>               | 411      |                                   | 0.612 <sup>a</sup> |

|                                          |     |                               |       |
|------------------------------------------|-----|-------------------------------|-------|
| <b>VEGF-C intensity, manual</b>          |     |                               |       |
| Negative                                 |     | 1.00                          |       |
| Weak                                     |     | 1.64 (0.56-4.75)              | 0.365 |
| Moderate/Strong                          |     | 1.45 (0.45-4.66)              | 0.530 |
| <b>Cancer cells VEGF-C intensity, SB</b> | 375 | 1.04 (0.85-1.29) <sup>c</sup> | 0.654 |

Abbreviations and definitions: *n*, Number of patients; OR, Odds ratio; CI, Confidence Interval; Multifocal, > 2cm between tumors; VI, Vascular invasion; NHG, Nottingham histological grade; ER, Estrogen receptor >1%; PR, Progesterone receptor >1%; HER2, Human epidermal growth factor receptor 2; Ki67, a proliferation marker; NST, No specific type; ILC, Invasive lobular carcinoma; VEGF-C, Vascular endothelial growth factor C; SB, script based

<sup>a</sup> Test of overall effect: assesses whether the odds of nodal metastases are the same across all categories.

<sup>b</sup> Modelled on log<sub>2</sub>-scale; therefore, the odds ratio corresponds to a doubling of the fraction of VEGF-C-stained stromal cells.

<sup>c</sup> Odds ratio per one standard deviation increase in intensity (measured in arbitrary units).

**Table 4:** Two multivariable logistic regression analyses for positive lymph node status, including stromal VEGF-C fraction assessed manually or script-based, respectively, along with other established clinicopathological predictors of this outcome. Two complete-case analyses based on data from the same 332 patients are presented. The reduction from 377 patients, who were assessed for stromal VEGF-C fraction by both methods, is mainly due to missing data on vascular invasion (VI), a factor that is difficult to assess preoperatively.

| Variable                    | Manual Stromal VEGF-C |             |                    | Script-based Stromal VEGF-C |             |         |
|-----------------------------|-----------------------|-------------|--------------------|-----------------------------|-------------|---------|
|                             | OR                    | 95% CI      | P-value            | OR                          | 95% CI      | P-value |
| <b>VEGF-C</b>               |                       |             | 0.027 <sup>a</sup> | 1.176 <sup>b</sup>          | 1.055-1.311 | 0.004   |
| 0%                          | 1.00                  |             |                    |                             |             |         |
| 1-5%                        | 2.55                  | 0.86-7.54   | 0.092              |                             |             |         |
| 6-25%                       | 4.00                  | 1.26-12.7   | 0.019              |                             |             |         |
| ≥26%                        | 3.72                  | 0.95-14.6   | 0.059              |                             |             |         |
| <b>Age, years</b>           | 0.971                 | 0.949-0.993 | 0.009              | 0.972                       | 0.950-0.994 | 0.014   |
| <b>Detection</b>            |                       |             |                    |                             |             |         |
| Screening                   | 1.00                  |             |                    | 1.00                        |             |         |
| Symptomatic                 | 1.35                  | 0.79-2.30   | 0.272              | 1.29                        | 0.76-2.20   | 0.349   |
| <b>Tumor size, mm</b>       | 1.102                 | 1.064-1.142 | <0.001             | 1.103                       | 1.064-1.144 | <0.001  |
| <b>Histological type</b>    |                       |             |                    |                             |             |         |
| NST                         | 1.00                  |             |                    | 1.00                        |             |         |
| ILC                         | 0.52                  | 0.24-1.13   | 0.101              | 0.52                        | 0.24-1.13   | 0.097   |
| Other                       | 0.62                  | 0.23-1.69   | 0.348              | 0.54                        | 0.20-1.47   | 0.228   |
| <b>Multifocality</b>        |                       |             |                    |                             |             |         |
| No                          | 1.00                  |             |                    | 1.00                        |             |         |
| Yes                         | 3.44                  | 1.32-8.97   | 0.012              | 3.40                        | 1.31-8.82   | 0.012   |
| <b>VI</b>                   |                       |             |                    |                             |             |         |
| No                          | 1.00                  |             |                    | 1.00                        |             |         |
| Yes                         | 2.14                  | 1.21-3.78   | 0.009              | 1.94                        | 1.09-3.45   | 0.024   |
| <b>NHG</b>                  |                       |             |                    |                             |             |         |
| I                           | 1.00                  |             |                    | 1.00                        |             |         |
| II                          | 0.77                  | 0.37-1.59   | 0.477              | 0.82                        | 0.39-1.70   | 0.587   |
| III                         | 0.57                  | 0.25-1.35   | 0.202              | 0.68                        | 0.29-1.59   | 0.375   |
| <b>ER-status</b>            |                       |             |                    |                             |             |         |
| Negative                    | 1.00                  |             |                    | 1.00                        |             |         |
| Positive                    | 1.26                  | 0.54-2.94   | 0.594              | 1.42                        | 0.61-3.33   | 0.417   |
| <b>Constant<sup>c</sup></b> | 0.15                  | 0.02-1.24   |                    | 0.44                        | 0.08-2.49   |         |

Abbreviations and definitions: OR, Odds ratio; CI, Confidence interval; VEGF-C, Vascular endothelial growth factor C; NST, No special type; ILC, Invasive lobular carcinoma; Multifocality, >2 cm between tumors; VI, Vascular invasion; NHG, Nottingham histological grade; ER, Estrogen receptor >1%

<sup>a</sup> Test of linear trend on the log-odds scale over the four manual VEGF-C categories conducted by assigning the scores 1 to 4 to the categories and adding this variable to the multivariable model instead of the corresponding factor variable with 3 degrees of freedom, thereby forcing the multiplicative increase in the odds of lymph node metastasis to be the same for all the three one-unit steps from 1 to 4.

<sup>b</sup> Modelled on  $\log_2$ -scale; therefore, the odds ratio corresponds to a doubling of the fraction of VEGF-C-stained stromal cells.

<sup>c</sup> The constants presented in the OR columns represent reference odds and are part of each prediction formula. They have no meaningful interpretation without centering of non-categorical variables. Hence, no *P*-values are presented.
